# Supplementary material for: Molecular and anatomical organization of the dorsal raphe nucleus
Source: eLife journal article supplement (doi:10.7554/elife.46464), 2019-08-14
Supplement: supp [file elife-46464-supp-v1.zip]

Archive with 16 entries (16 files):
- elife_poa_e46464_Figure_1_figure_supplement_1.pdf
- elife_poa_e46464_Figure_4_figure_supplement_1.pdf
- elife_poa_e46464_Figure_6_figure_supplement_1.pdf
- elife_poa_e46464_Figure_3_figure_supplement_1.pdf
- elife_poa_e46464_Figure_5_figure_supplement_1.pdf
- elife_poa_e46464_Figure_4_figure_supplement_2.pdf
- elife_poa_e46464_Figure_5_figure_supplement_2.pdf
- elife_poa_e46464_Supplementary_file_1.docx
- elife_poa_e46464_Figure_7_figure_supplement_1.pdf
- elife_poa_e46464_Transparent_Reporting_File.pdf
- elife_poa_e46464_Figure_6_figure_supplement_3.pdf
- elife_poa_e46464_Figure_4_figure_supplement_3.pdf
- elife_poa_e46464_Figure_6_figure_supplement_2.pdf
- elife_poa_e46464_Figure_1_figure_supplement_2.pdf
- elife_poa_e46464_Supplementary_file_2.xlsx
- elife_poa_e46464_Figure_8_figure_supplement_1.pdf
