# Supplementary material for: Molecular and anatomical organization of the dorsal raphe nucleus
Source: eLife journal article supplement (doi:10.7554/elife.46464), 2019-08-14
Supplement: supp [file elife-46464-supp-v1.zip › elife_poa_e46464_Supplementary_file_2.xlsx]

## Sheet: Sheet1
Gene Symbol	ABA Experiment ID	ABA Experiment Image No. / AP position
		AP = -3.80 mm	AP = -3.90 mm	AP = -4.00 mm	AP = -4.10 mm	AP = -4.20 mm	AP = -4.30 mm	AP = -4.40 mm	AP = -4.50 mm	AP = -4.60 mm	AP = -4.70 mm	AP = -4.80 mm	AP = -4.90 mm
Adcy2	79567501	37	38	39	40	41	-	-	-	42	-	-	43
Aldoc	73512352	-	40	-	41	-	42	-	43	44	-	45	46
Aldoc	79556636	39	40	-	41	-	42	-	43	-	-	44	45
Ankrd6	71247671	38	39	-	40	-	41	-	-	42	-	-	43
Asb4	71358591	76	77	78	79	80	81	82	83	84	85	86	87
Atp1a1	71836844	38	-	39	-	40	-	-	41	-	42	-	43
Atp2b1	77280449	39	40	-	-	41	-	42	-	-	43	-	44
Atp6v1e1	655501	-	68	69	70	71	72	73	74	75	76	77	-
Atp8a1	7481560	39	-	40	-	41	-	42	-	43	-	44	45
B2m	71924291	35	36	37	-	-	38	-	39	-	-	40	41
B630019K06Rik	74881160	75	76	77	78	79	-	80	81	82	83	84	85
Bcat1	71016665	76	77	-	78	79	80	81	82	83	84	85	86
Btbd3	71016618	78	79	80	81	82	83	84	85	86	87	88	89
Cachd1	72119579	34	35	-	36	-	37	-	38	-	-	39	40
Cacna2d1	72119649	40	41	42	-	43	-	-	44	-	45	-	46
Cacna2d1	75042246	38	39	40	-	41	-	-	42	-	43	44	45
Cacna2d2	72119650	40	41	-	-	42	-	43	-	44	-	45	46
Cacng4	72119652	-	-	39	-	-	40	-	-	-	41	42	43
Calb1	71717640	76	77	-	78	79	80	81	82	83	84	85	86
Calb1	79556672	39	40	-	-	41	42	-	43	44	-	-	45
Car10	71587832	81	82	83	84	-	85	-	86	87	88	89	90
Cbln2	70231306	79	80	81	82	83	84	85	86	-	-	87	88
Cd24a	79591541	36	37	38	-	39	-	-	40	-	41	-	42
Cd47	357100	29	-	-	30	-	31	-	-	32	-	33	34
Cdh13	77869863	35	-	-	36	-	-	37	-	38	-	39	-
Cdh13	79490066	40	-	-	-	41	42	-	-	43	-	44	-
Cdyl2	74641321	35	-	36	-	37	-	-	38	-	39	40	41
Chgb	70743886	75	76	77	78	79	80	81	82	83	84	85	86
Clcn5	75749741	67	68	69	70	71	72	73	74	-	75	76	77
Clic1	67809267	70	71	72	73	74	75	76	77	78	79	80	81
Clstn2	73636091	37	-	38	-	39	-	40	-	41	-	42	43
Col25a1	71924301	-	-	-	40	-	41	-	42	-	43	-	44
Crhr2	79907934	39	-	40	41	-	42	-	-	43	-	44	45
Crim1	72283807	71	72	73	74	75	76	77	78	79	80	81	82
Crtac1	75749739	70	71	72	73	74	75	-	76	77	-	79	80
Crym	73592526	79	80	81	82	83	84	85	86	-	87	88	89
Cthrc1	72472772	35	36	-	37	-	38	-	39	-	40	-	41
Cygb	72103830	40	-	-	41	-	42	-	43	-	-	44	45
Dicer1	74988272	37	38	-	-	39	-	-	-	40	-	41	42
Dkk3	79556605	39	40	-	-	41	-	-	42	43	-	44	-
Dlg2	73817444	76	77	78	79	80	81	82	83	-	84	85	86
Dnm3	74641219	38	-	39	-	40	-	41	-	42	-	43	44
Dpp10	72104183	40	41	-	42	-	43	-	-	44	-	45	46
Dpy19l1	75042226	37	38	39	-	-	-	40	-	41	-	42	-
Elmo1	70743907	74	75	76	77	-	78	79	80	81	82	83	84
En2	74988733	36	-	37	-	-	38	39	-	-	40	41	42
Exoc4	74658239	40	-	41	-	42	-	43	-	44	-	45	46
Fam3c	75259443	37	38	-	39	-	40	-	41	-	42	-	43
Fam84a	70927811	75	76	77	78	79	80	81	82	83	84	85	86
Fat3	73992719	77	78	79	80	81	82	83	84	85	86	87	-
Fat3	74047713	75	76	77	78	79	80	81	82	-	83	84	85
Fgfr1	79588290	39	40	-	-	41	-	42	-	-	43	44	45
Fnbp1l	70560266	75	76	77	78	79	80	81	82	83	84	85	86
Gabrg3	69257295	79	80	81	82	83	84	85	86	87	88	89	90
Gad1	79556706	37	38	39	-	-	-	40	-	41	-	42	43
Gad2	79591669	34	-	35	36	-	-	37	-	38	-	39	40
Galnt18	70928328	76	77	78	79	80	81	82	83	84	85	86	87
Gfra1	71064217	80	81	82	83	84	85	86	87	88	89	90	91
Gpc3	71020431	72	73	74	75	76	77	78	79	80	81	-	82
Grin2a	75081000	36	37	38	-	39	-	-	40	-	41	-	42
Gsta4	77278951	33	34	-	35	36	-	-	-	37	-	38	39
Hrh1	72283792	73	74	75	76	77	78	79	80	81	82	83	84
Hspa12a	74047899	-	38	39	-	40	-	41	-	42	-	43	44
Ighm	72109389	34	-	35	-	36	-	37	-	38	39	40	-
Ina	70836833	-	36	-	37	-	38	-	-	-	39	40	-
Lpar1	79556595	37	38	-	39	-	-	40	-	41	-	42	-
Lypd6	77332684	36	37	-	38	-	-	39	-	40	-	41	42
Maob	71670489	39	40	-	41	-	42	-	43	-	-	44	45
Met	79591401	36	-	-	37	-	38	-	39	40	-	41	42
Mgll	72129243	39	40	41	-	42	-	-	43	-	44	45	46
Mical2	71249740	40	41	-	42	-	-	43	-	44	-	45	46
Mrap2	71924480	37	38	-	39	-	40	-	41	-	42	43	44
Necab2	73788010	73	74	75	76	-	77	78	79	80	81	82	83
Nefl	73512198	40	41	-	42	-	-	43	-	-	-	44	45
Nefm	73817434	75	76	77	78	79	80	81	82	83	84	85	86
Nell2	72103854	38	39	-	40	-	41	-	-	42	-	43	-
Nfix	77413698	30	31	-	-	32	-	-	33	-	34	-	35
Nos1	75147762	77	78	79	80	81	82	83	84	85	-	86	87
Nptx1	73520998	31	-	32	33	-	-	34	-	-	35	36	37
Nr2f2	112646890	33	34	35	-	-	-	36	-	37	-	38	-
Nrxn3	75042240	40	-	41	-	-	42	-	43	-	44	-	45
Nxph1	75084479	-	40	-	41	-	-	42	-	43	-	44	-
Nxph4	73521000	-	-	-	31	-	32	-	33	-	-	34	35
Pam	73997147	40	-	41	-	42	-	43	-	-	44	-	45
Pbx3	76085744	32	-	33	-	34	-	-	35	-	36	-	-
Pcdh11x	73521002	40	-	41	-	42	-	-	43	-	44	45	-
Pcdh7	69782790	40	-	41	-	42	43	-	-	-	44	45	46
Pcsk6	75084491	38	-	39	-	-	40	-	41	-	42	-	43
Pdyn	71717084	77	78	79	80	81	82	83	84	85	86	87	88
Pgm2l1	70615597	-	76	77	78	79	80	81	82	-	-	84	85
Plch1	71717604	73	74	75	76	77	78	79	80	81	82	83	84
Prkca	77869816	-	36	37	38	-	-	39	-	-	40	41	-
Prkcq	77869867	31	-	-	-	-	32	-	33	-	34	-	35
Prph	70232000	76	77	78	79	80	81	-	82	83	84	85	86
Ptprt	72008491	72	73	74	75	76	77	78	79	80	81	82	83
Rab3c	73521805	37	-	38	-	39	-	40	-	41	-	42	43
Rcn2	73997151	-	36	-	37	-	38	-	-	39	-	40	-
Rgs10	74511849	77	78	79	80	81	82	83	84	85	86	87	88
Rprm	71836875	40	41	-	42	-	43	-	-	44	-	45	46
Rprm	75651169	-	38	-	39	-	-	-	-	41	-	42	43
Rps6ka2	70301276	77	78	79	80	81	82	83	84	85	86	87	88
Rxfp1	70562124	77	78	79	80	81	82	83	84	85	86	87	88
S100a16	77371787	33	34	-	35	-	-	36	-	-	37	-	38
Sdk2	77332746	-	38	39	-	40	-	41	-	-	-		42
Sema6a	71358651	79	80	81	82	83	84	85	86	87	88	89	90
Sh3bp4	75774110	38	-	-	39	40	-	-	41	-	42	-	43
Slc17a8	71587918	74	75	76	77	78	79	80	81	82	83	84	85
Slc22a3	73931644	37	-	38	-	39	-	40	-	41	-	42	-
Slc36a1	75041491	38	39	40	-	-	41	-	42	-	43	-	44
Slc6a1	79597685	35	-	36	-	37	-	38	-	39	-	40	41
Slit2	79591683	35	-	-	-	36	-	-	-	37	-	38	-
Snca	79908848	29	30	31	-	32	-	-	33	-	34	-	35
Sorcs1	74800882	37	-	38	-	39	-	40	-	41	-	42	43
Sorcs3	75988635	29	30	-	-	31	-	-	32	-	-	-	-
Sparcl1	74750016	37	38	-	39	-	40	-	41	-	42	-	43
Syt13	74750264	39	-	-	40	-	41	-	-	42	-	43	44
Tagln3	75988633	34	-	35	36	-	37	-	38	-	-	39	40
Tenm2	79591631	-	-	33	34	-	35	-	36	-	-	37	-
Tmem176b	77866852	35	-	36	-	-	37	-	38	-	-	39	-
Tph2	74511925	72	73	74	75	76	77	78	79	80	81	82	83
Trh	71016631	75	76	77	78	79	80	81	82	83	84	85	86
Tuba4a	70616005	77	78	79	80	81	82	83	84	85	86	87	88
Ube2ql1	71249083	35	-	36	-	37	-	38	-	39	-	40	41
Usp11	355883	27	-	28	-	29	-	30	-	31	-	32	-
Usp11	77869130	38	39	-	-	-	40	-	41	-	42	43	44
Utrn	73929872	40	-	-	41	-	-	42	-	-	43	44	45
Vat1l	75650860	74	75	76	77	78	79	80	81	82	83	84	85
Wnt5a	79556660	-	34	-	-	-	36	-	-	37	-	38	39
Wscd1	71920517	38	-	39	-	40	-	41	-	42	-	43	44
Zbtb20	79568020	37	-	38	-	39	40	-	41	-	-	42	-
