# Supplementary figures and images for: Molecular and anatomical organization of the dorsal raphe nucleus
Source: eLife journal article supplement (doi:10.7554/elife.46464), 2019-08-14

**Figure 5—Figure Supplement 1**

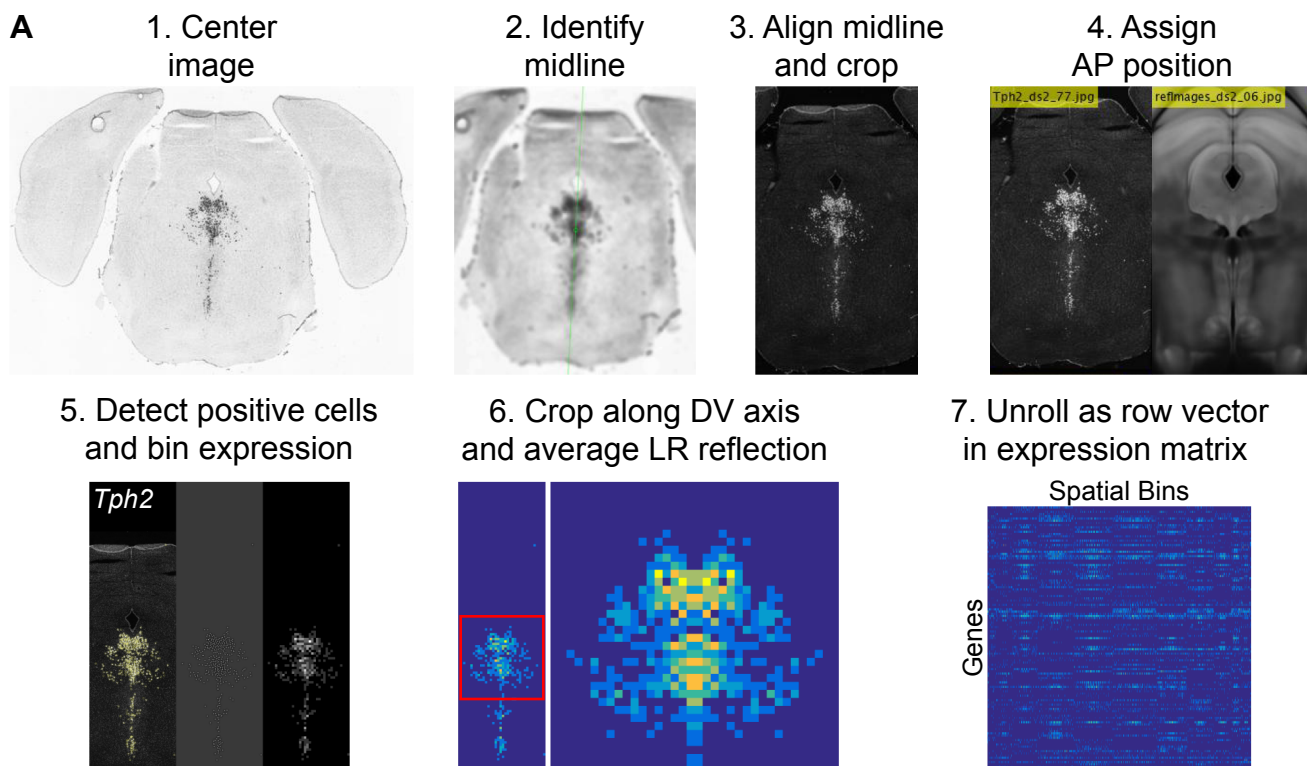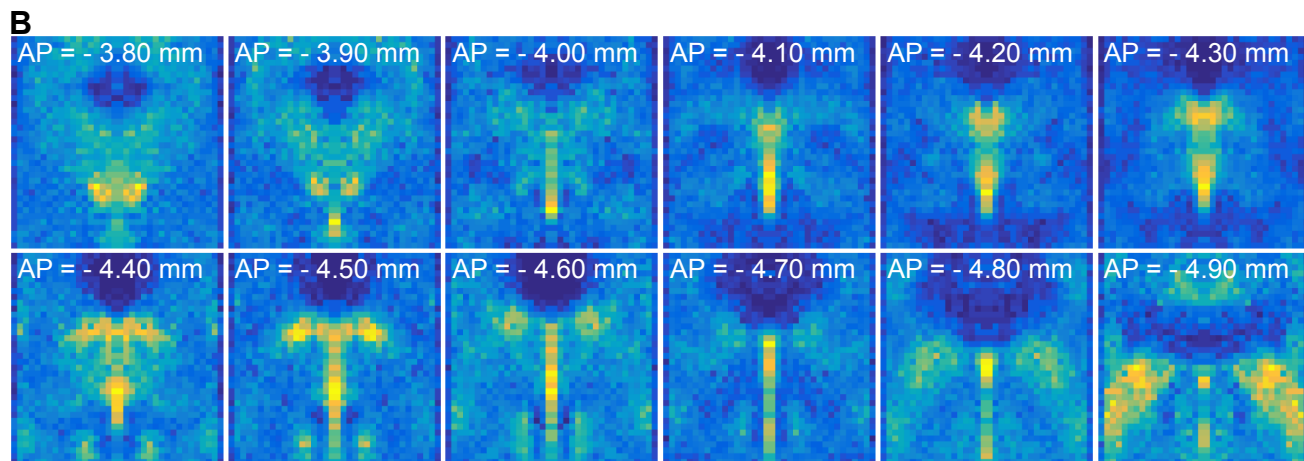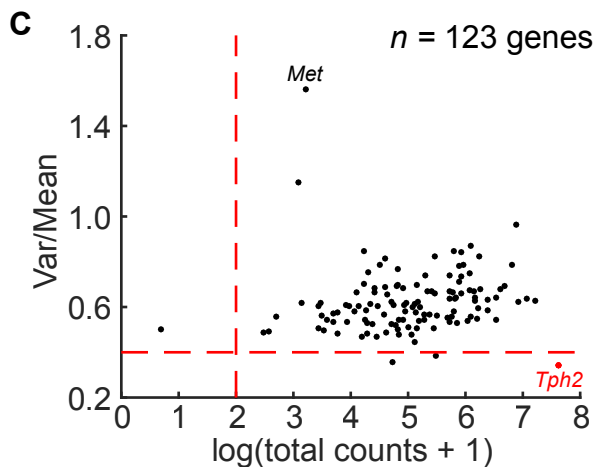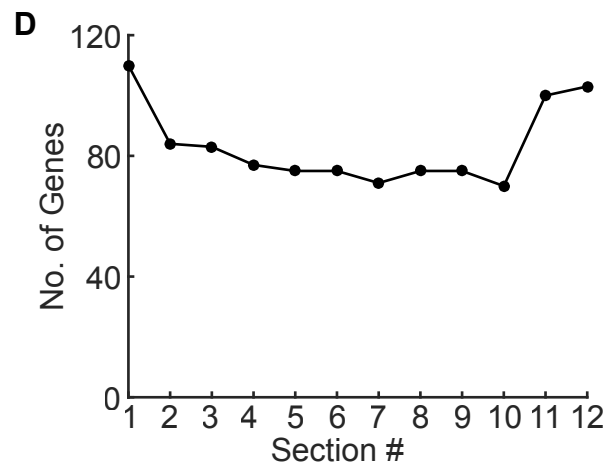

Supplement: supp [file elife-46464-supp-v1.zip]

**Figure 6–Figure Supplement 3**

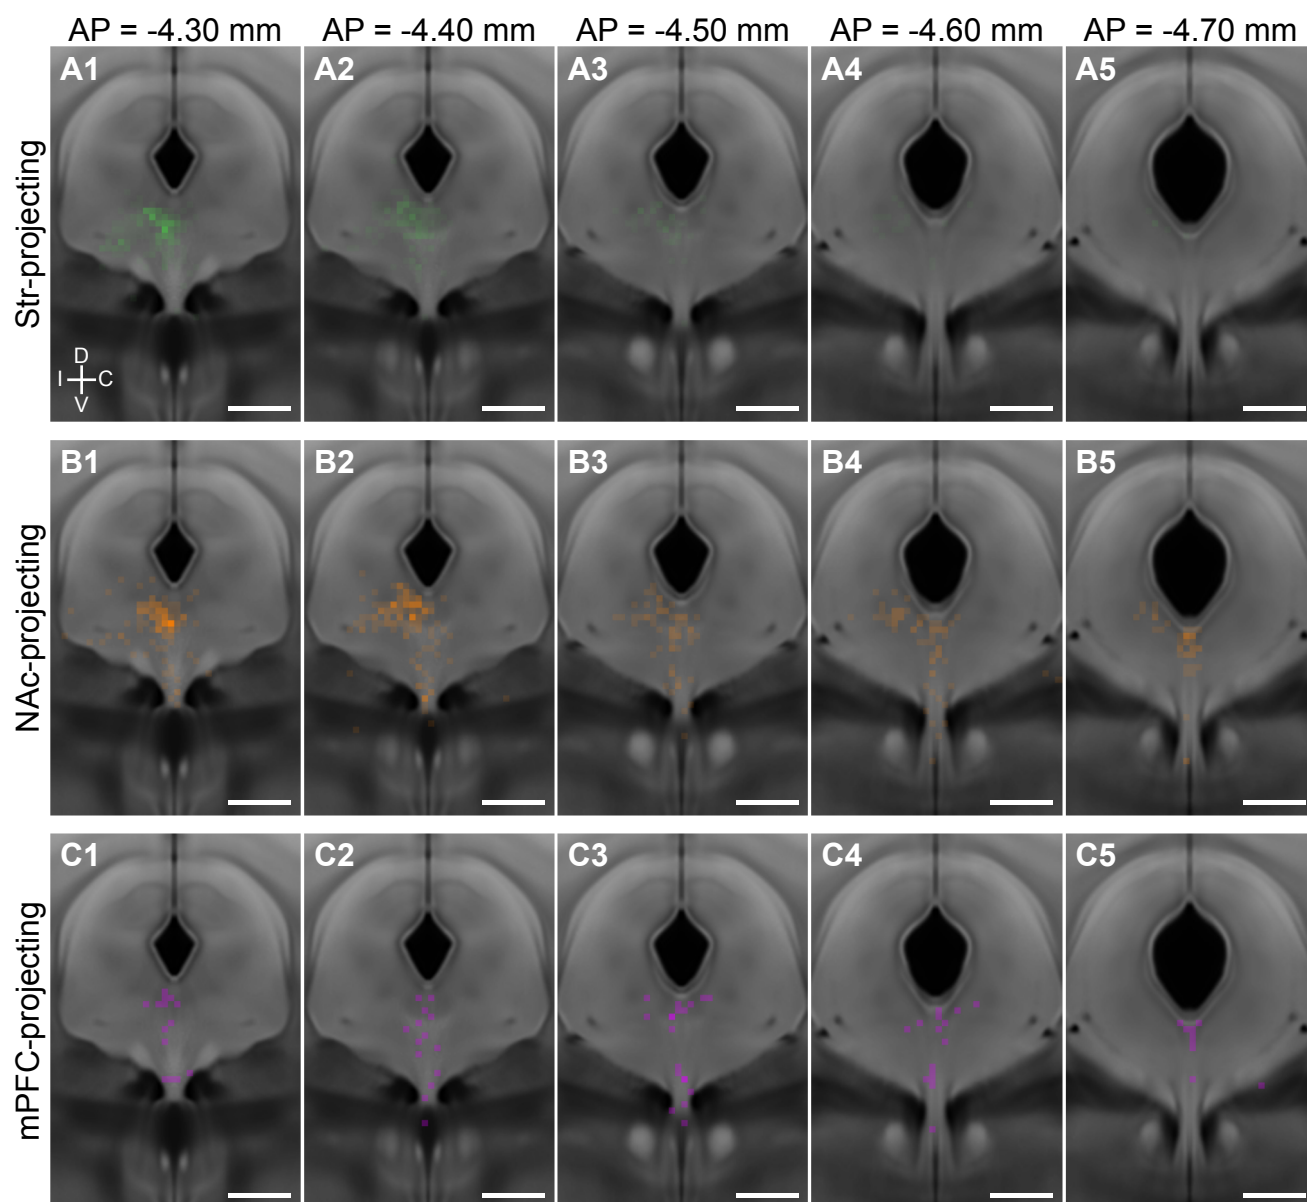

Supplement: supp [file elife-46464-supp-v1.zip]

**Figure 7–Figure Supplement 1**

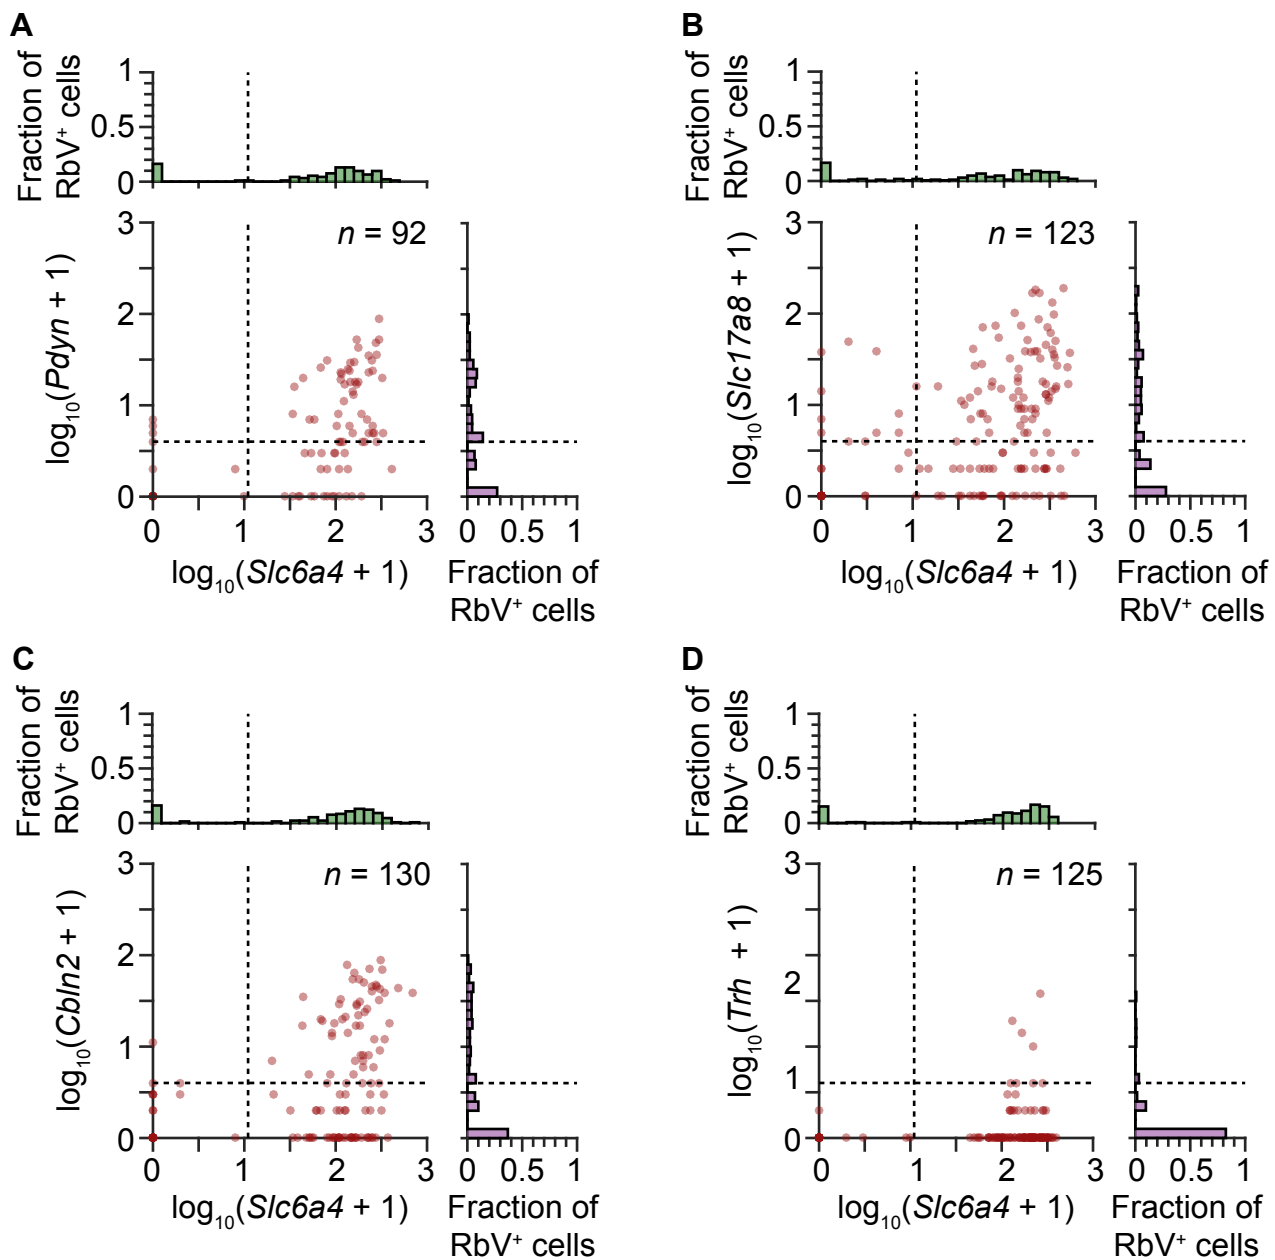

Supplement: supp [file elife-46464-supp-v1.zip]

Figure 1–Figure Supplement 1

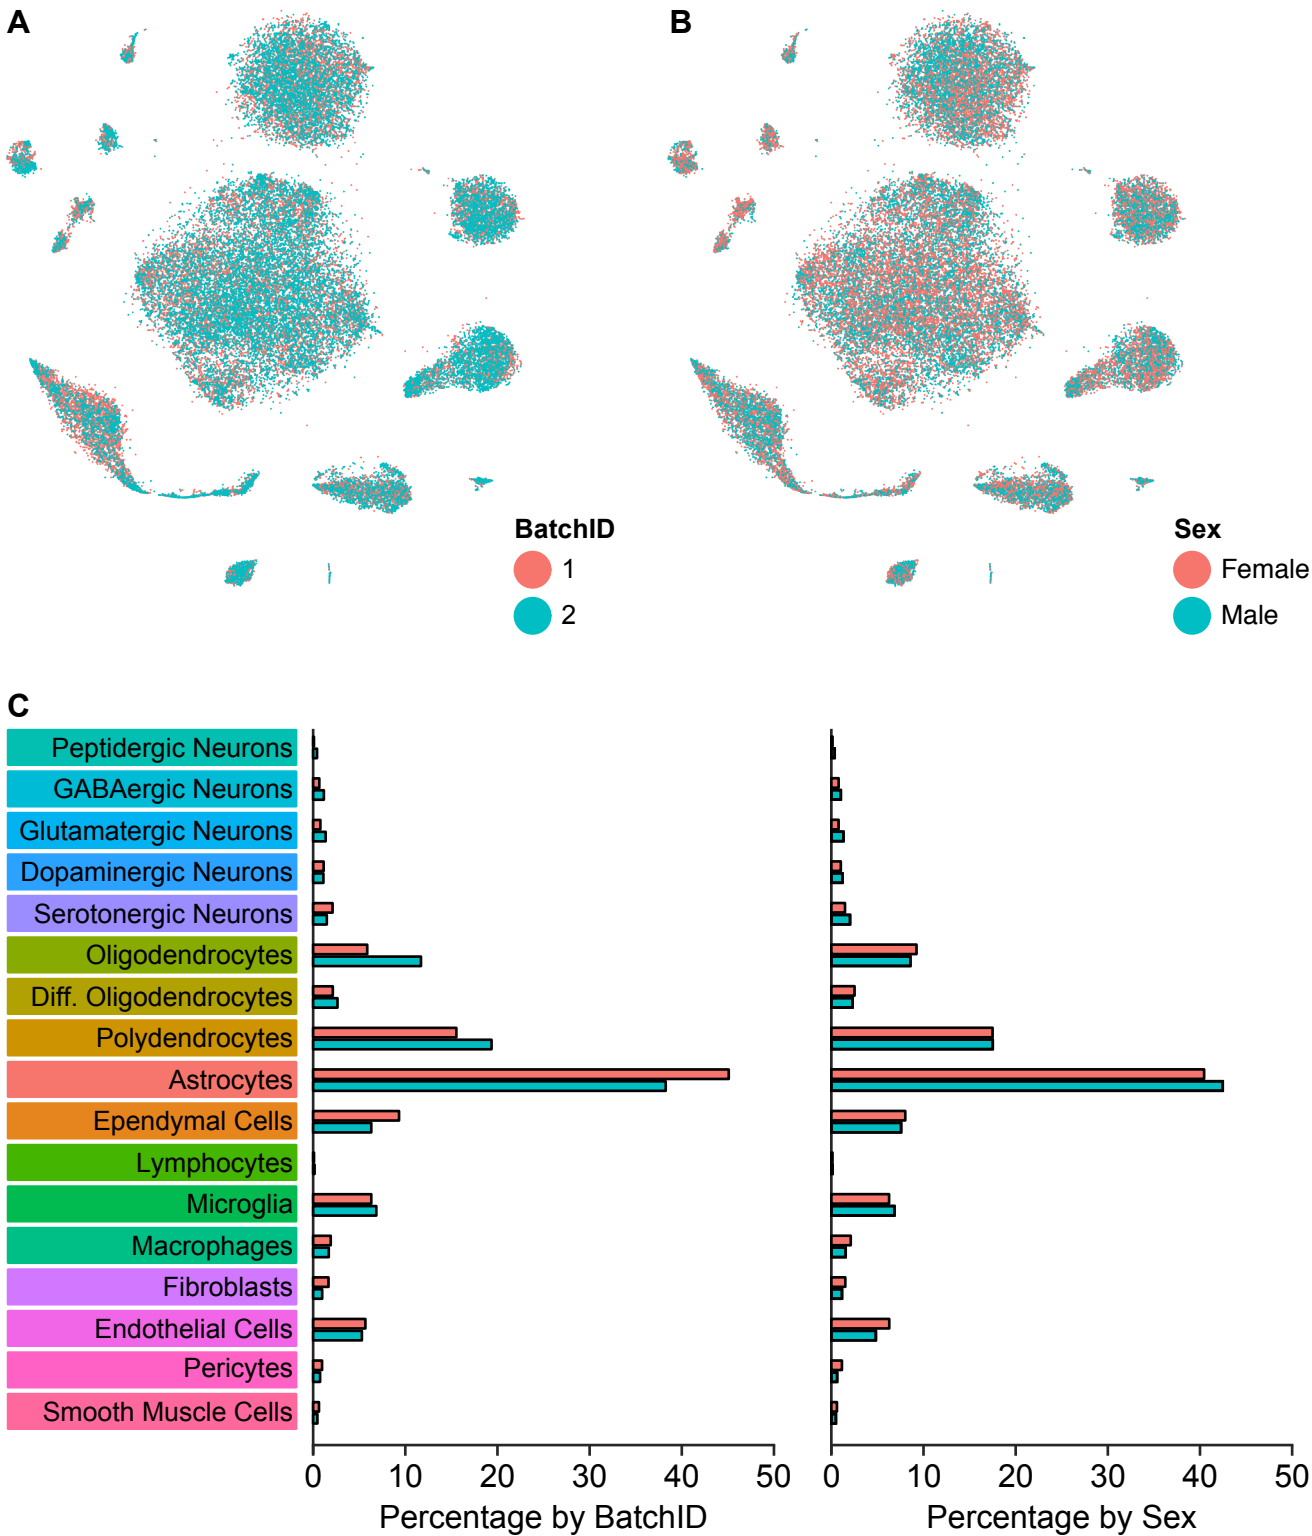

Supplement: supp [file elife-46464-supp-v1.zip › elife_poa_e46464_Figure_1_figure_supplement_1.pdf]

Figure 4–Figure Supplement 1

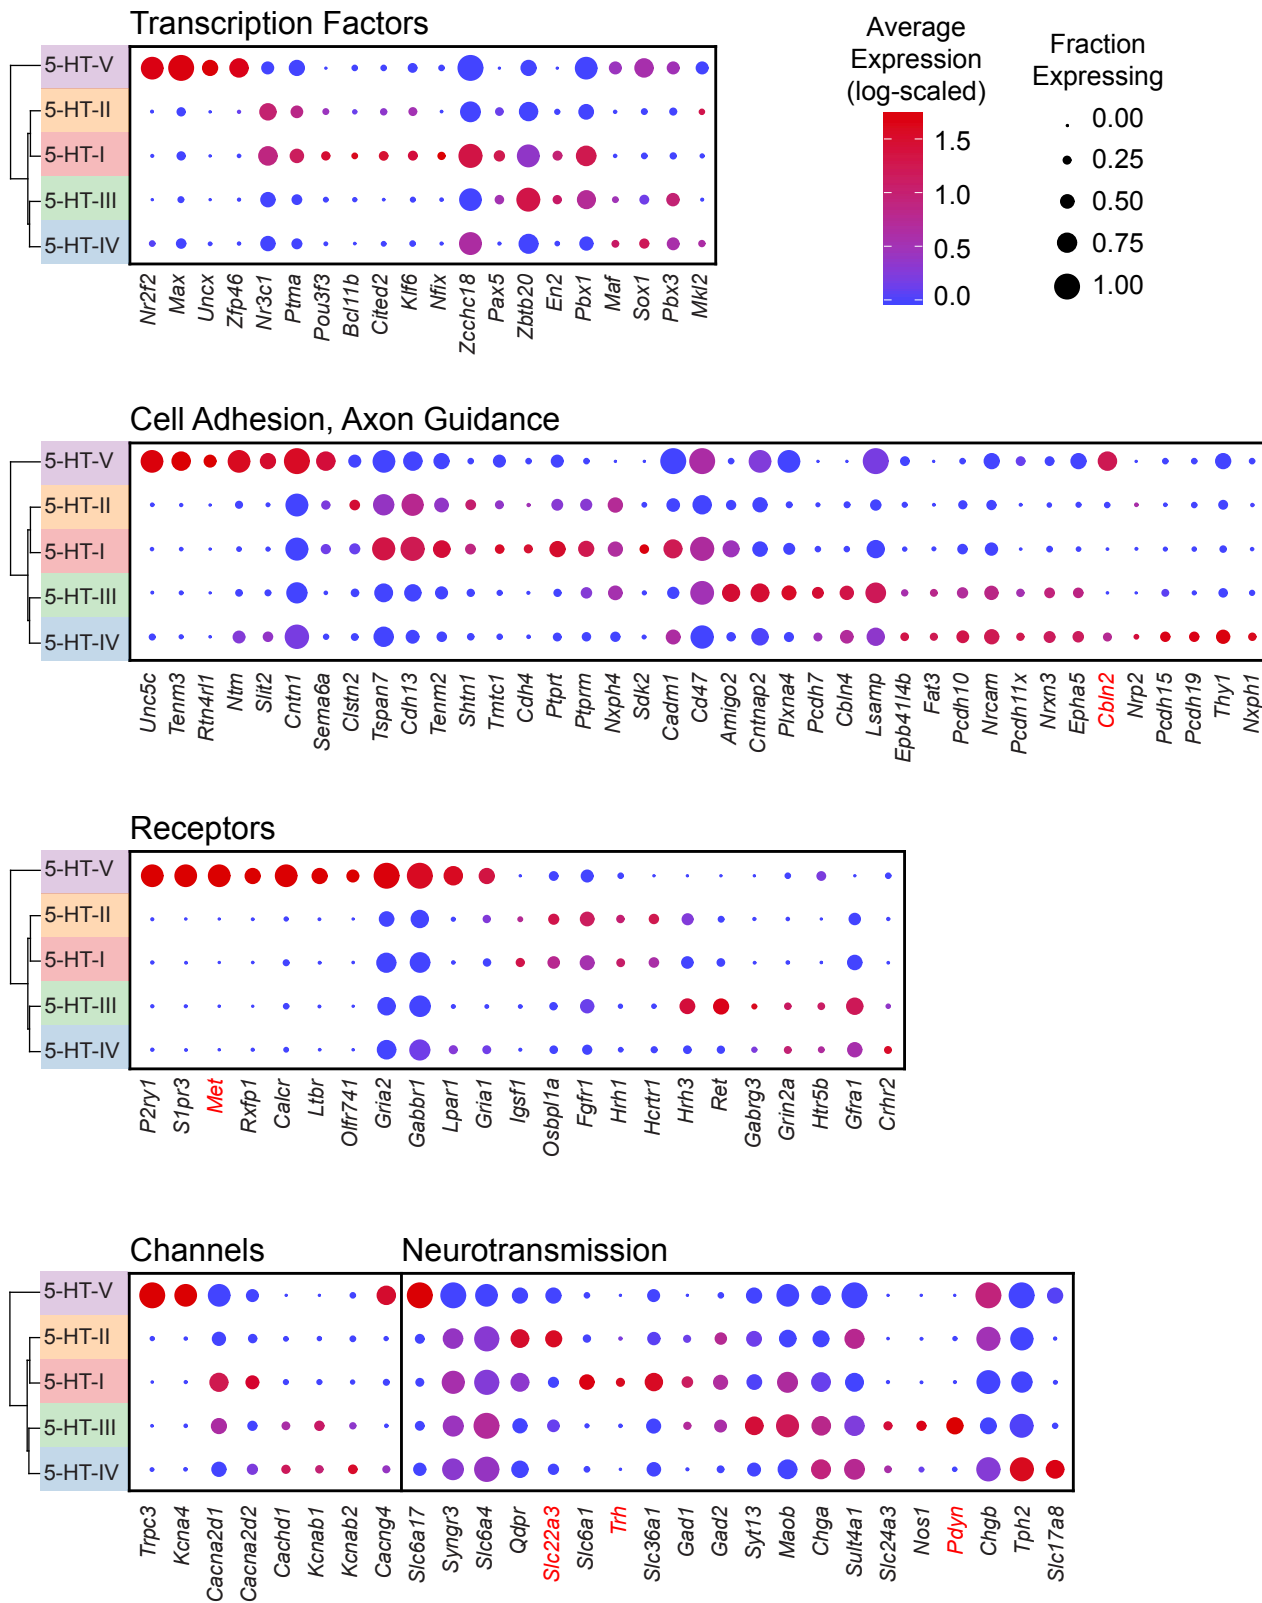

Supplement: supp [file elife-46464-supp-v1.zip › elife_poa_e46464_Figure_4_figure_supplement_1.pdf]

**Figure 6–Figure Supplement 1**

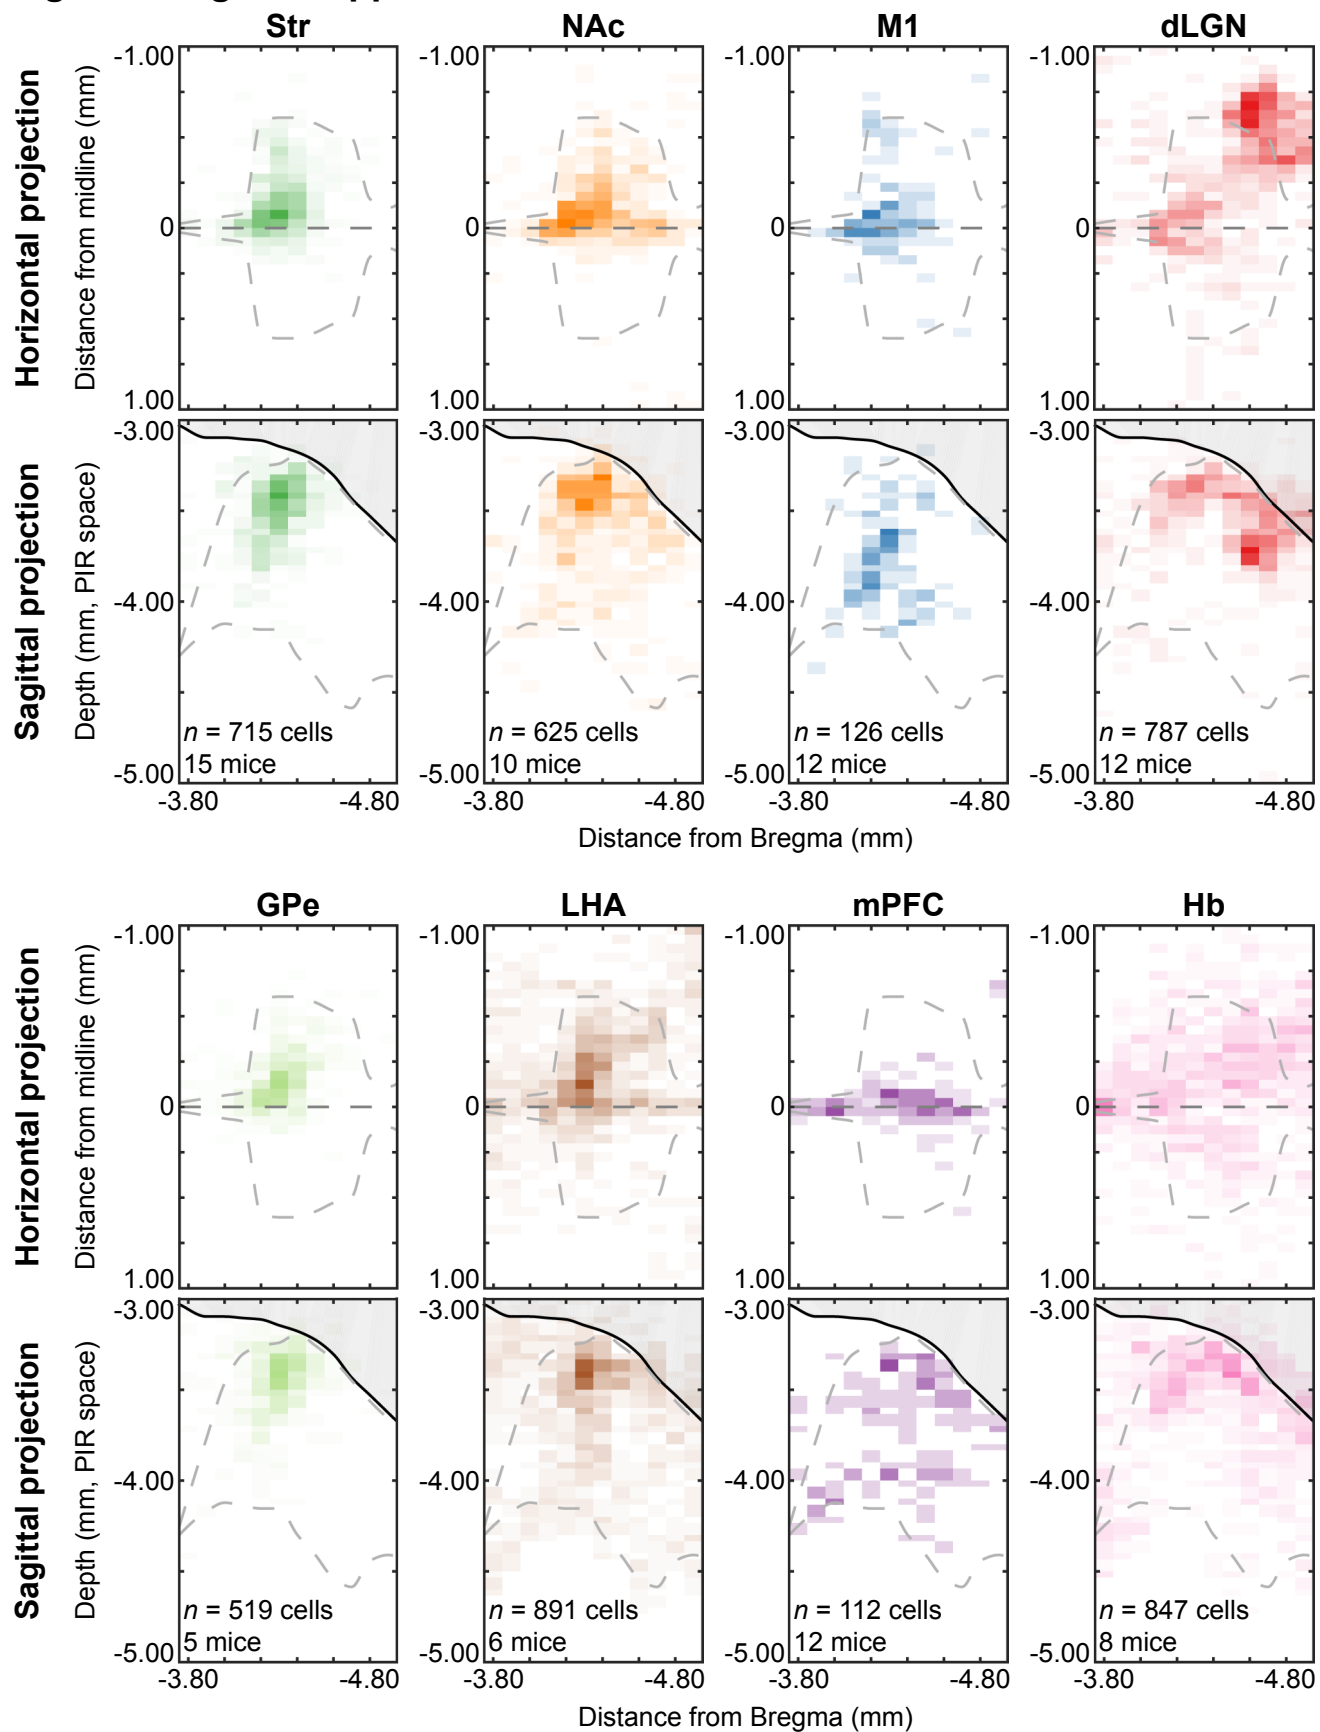

Supplement: supp [file elife-46464-supp-v1.zip › elife_poa_e46464_Figure_6_figure_supplement_1.pdf]

Figure 3–Figure Supplement 1

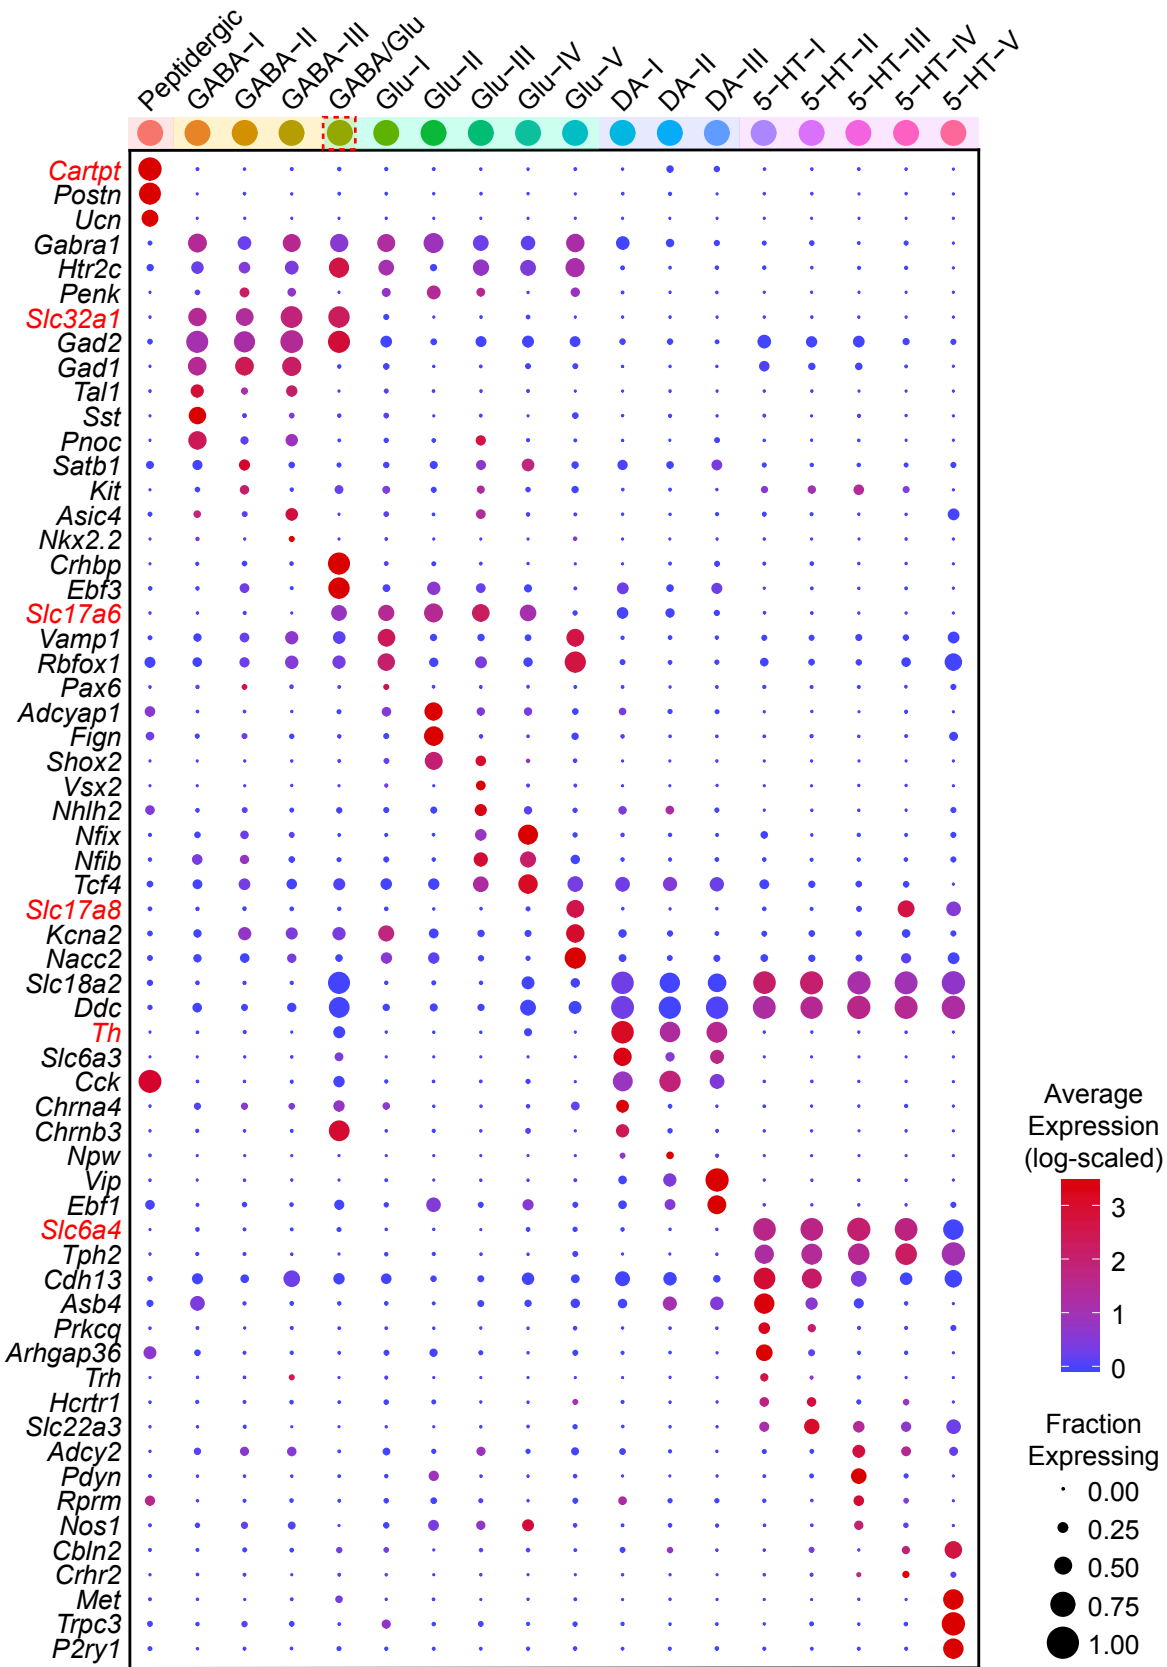

Supplement: supp [file elife-46464-supp-v1.zip › elife_poa_e46464_Figure_3_figure_supplement_1.pdf]

Figure 4–Figure Supplement 2

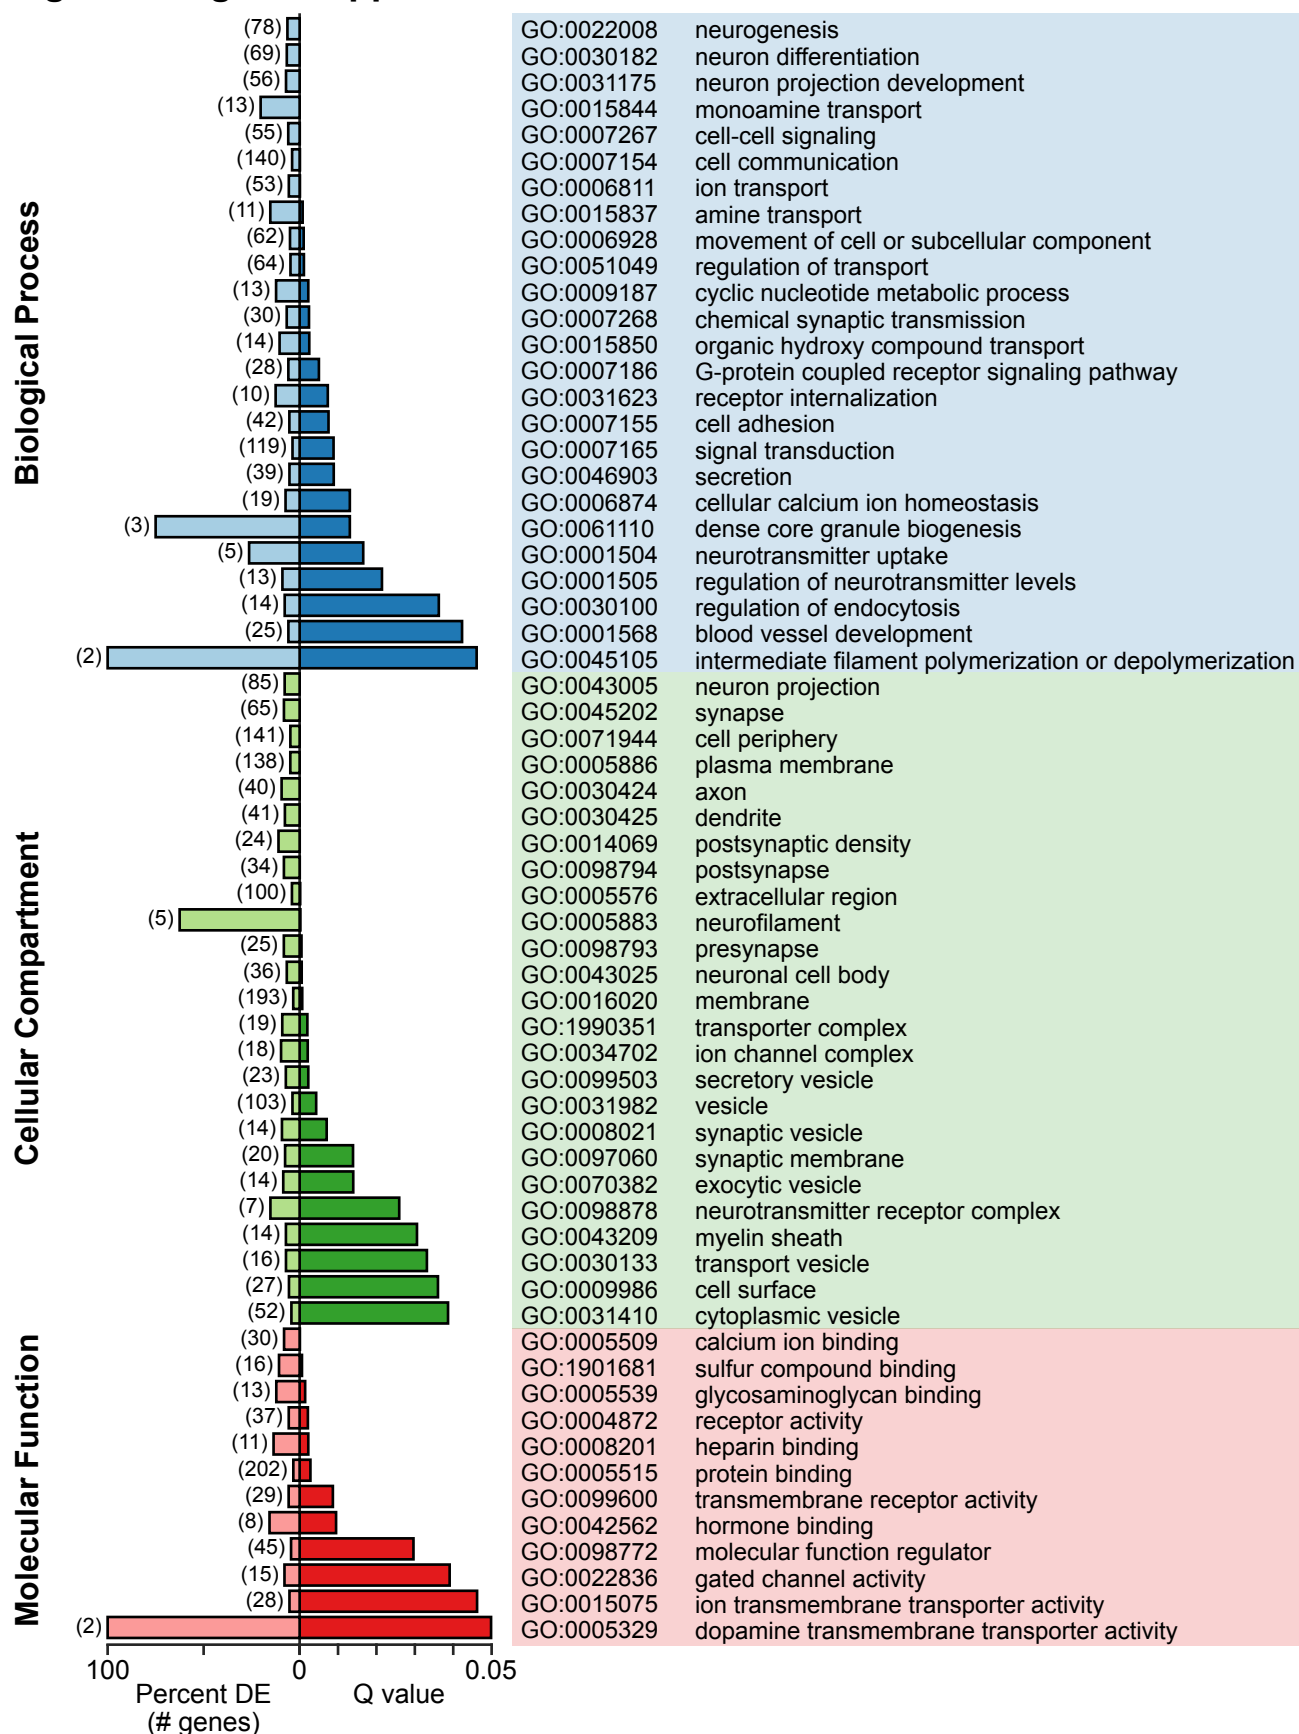

Supplement: supp [file elife-46464-supp-v1.zip › elife_poa_e46464_Figure_4_figure_supplement_2.pdf]

**Figure 5–Figure Supplement 2**

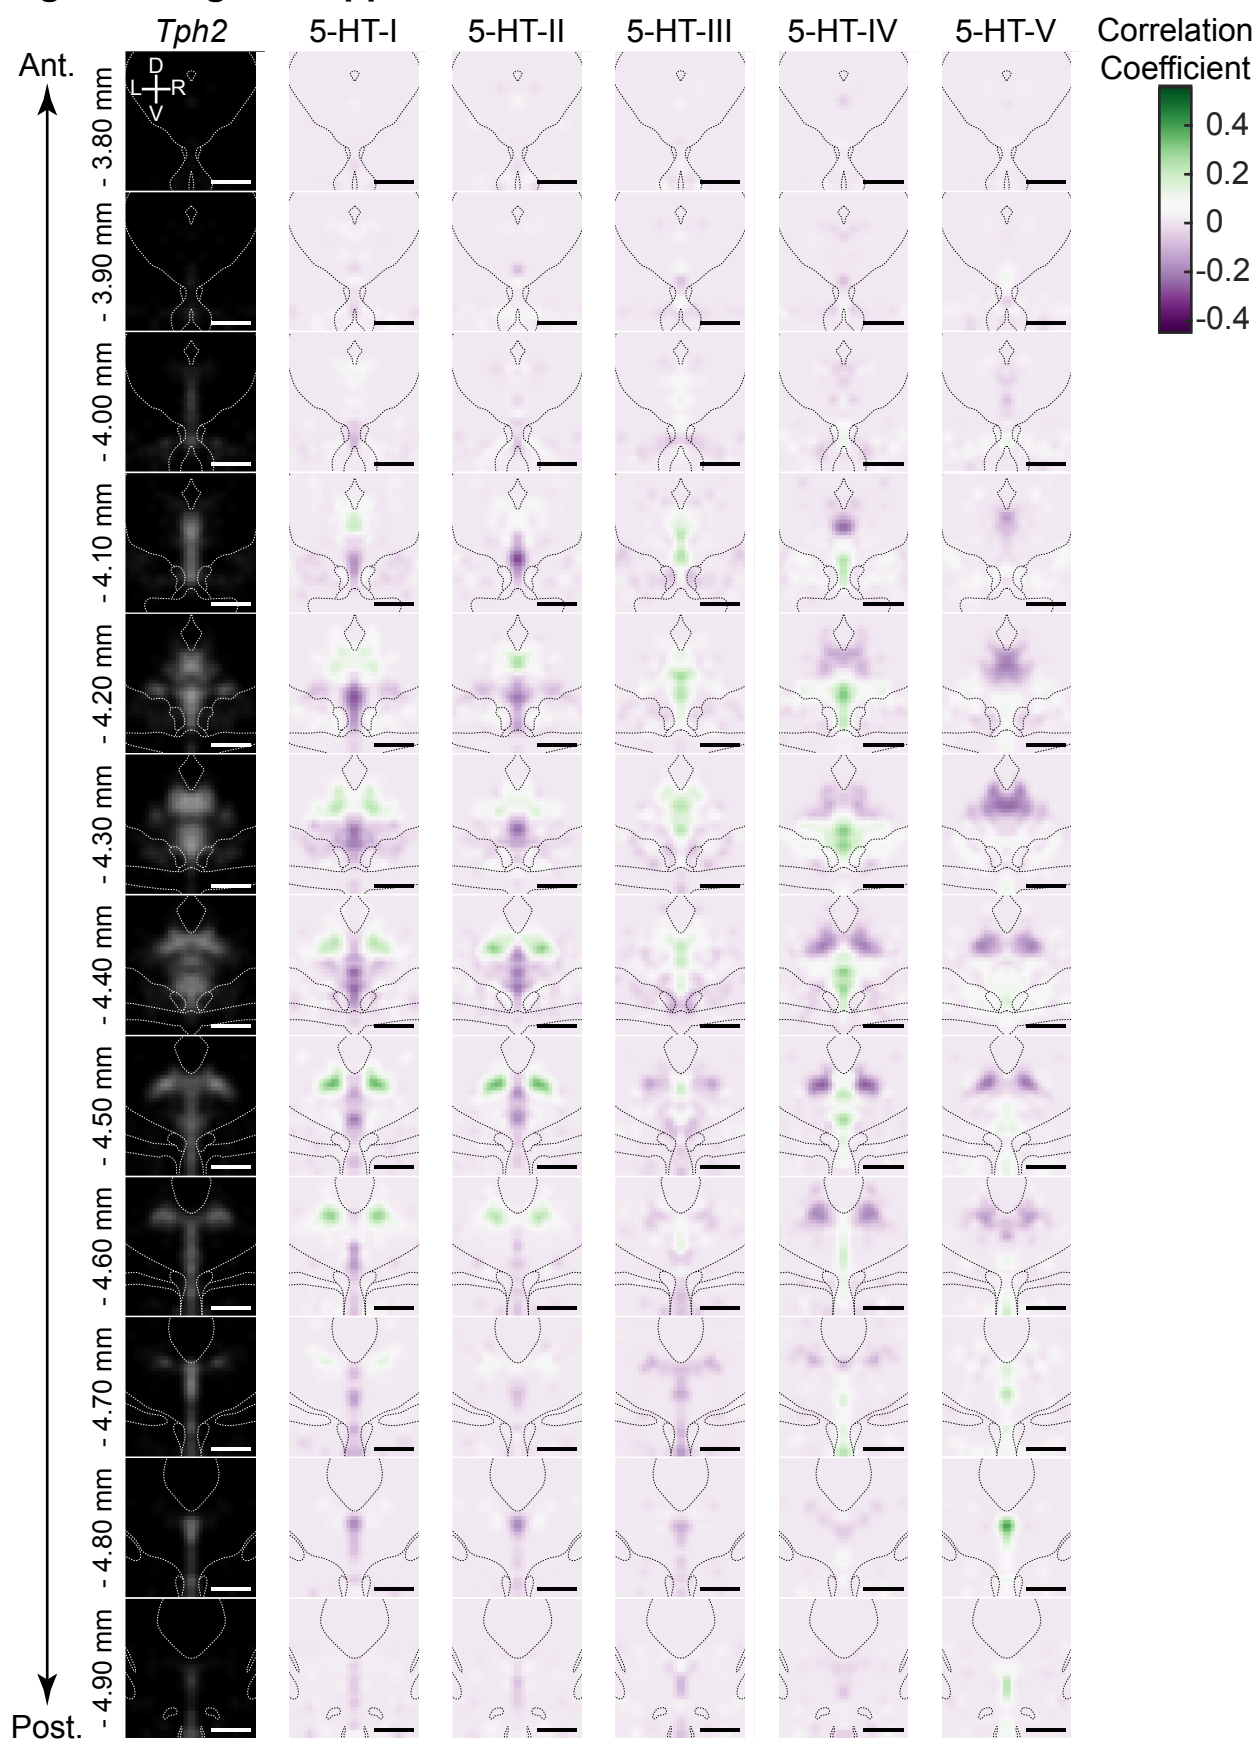

Supplement: supp [file elife-46464-supp-v1.zip › elife_poa_e46464_Figure_5_figure_supplement_2.pdf]

## Figure 4–Figure Supplement 3

### 5-HT-I/II vs. 5-HT-III vs. 5-HT-IV

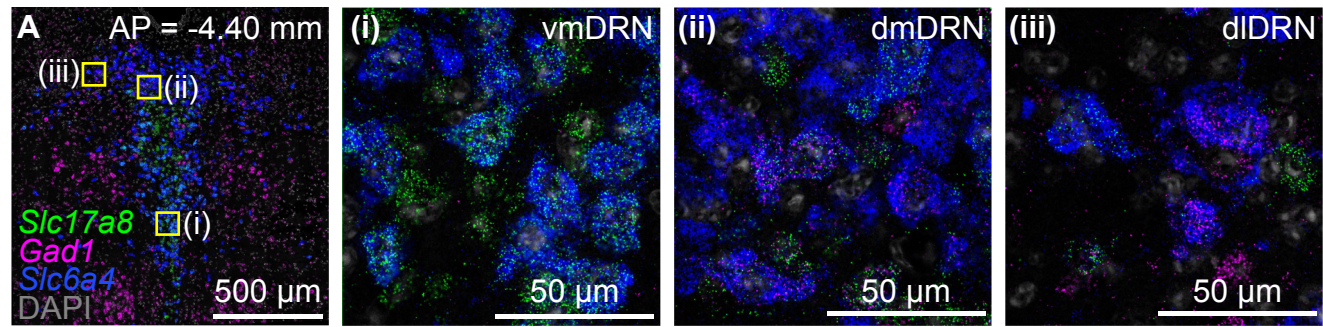

### 5-HT-III vs. 5-HT-IV

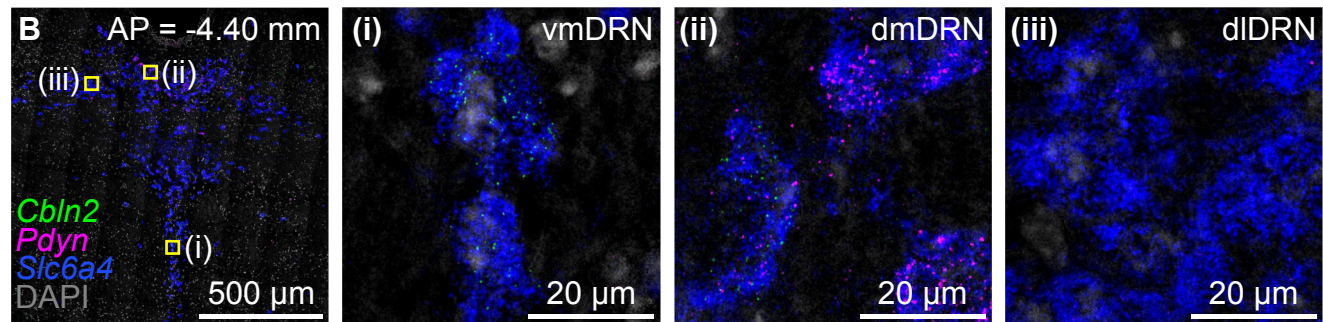

### 5-HT-V

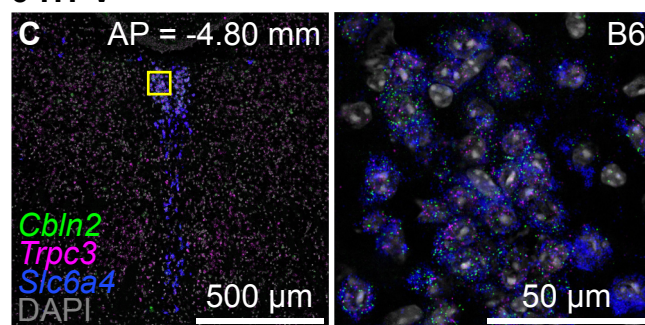

### 5-HT-I vs. 5-HT-II

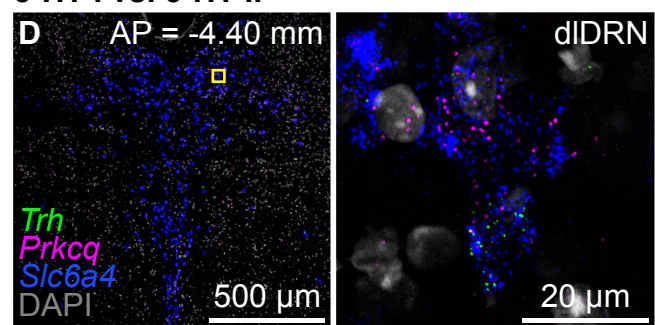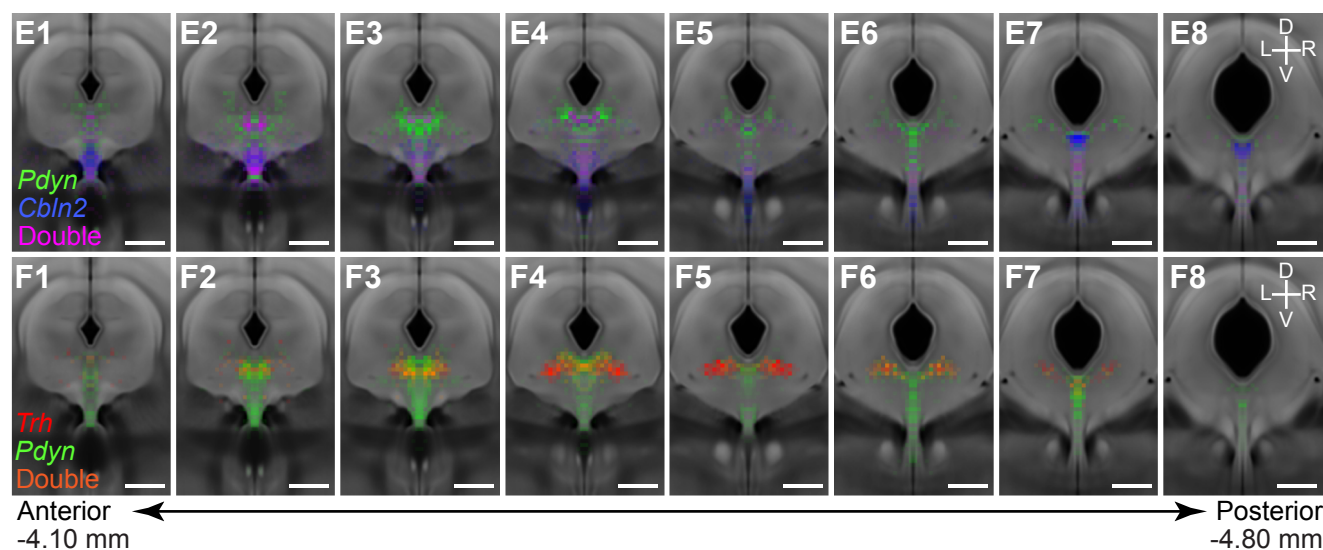

Supplement: supp [file elife-46464-supp-v1.zip › elife_poa_e46464_Figure_4_figure_supplement_3.pdf]

**Figure 6–Figure Supplement 2**

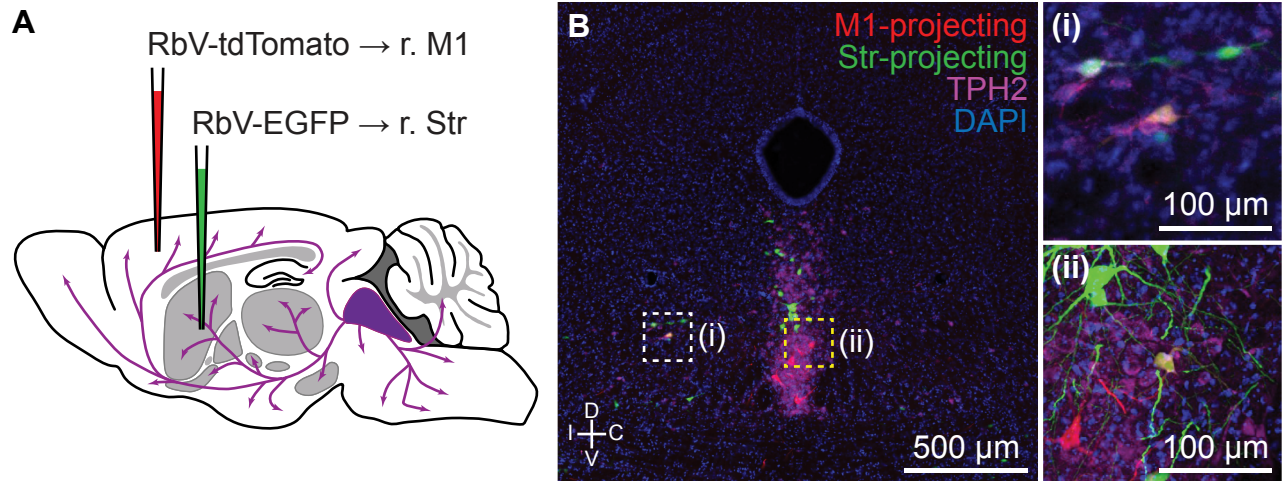

Supplement: supp [file elife-46464-supp-v1.zip › elife_poa_e46464_Figure_6_figure_supplement_2.pdf]

## Figure 1–Figure Supplement 2

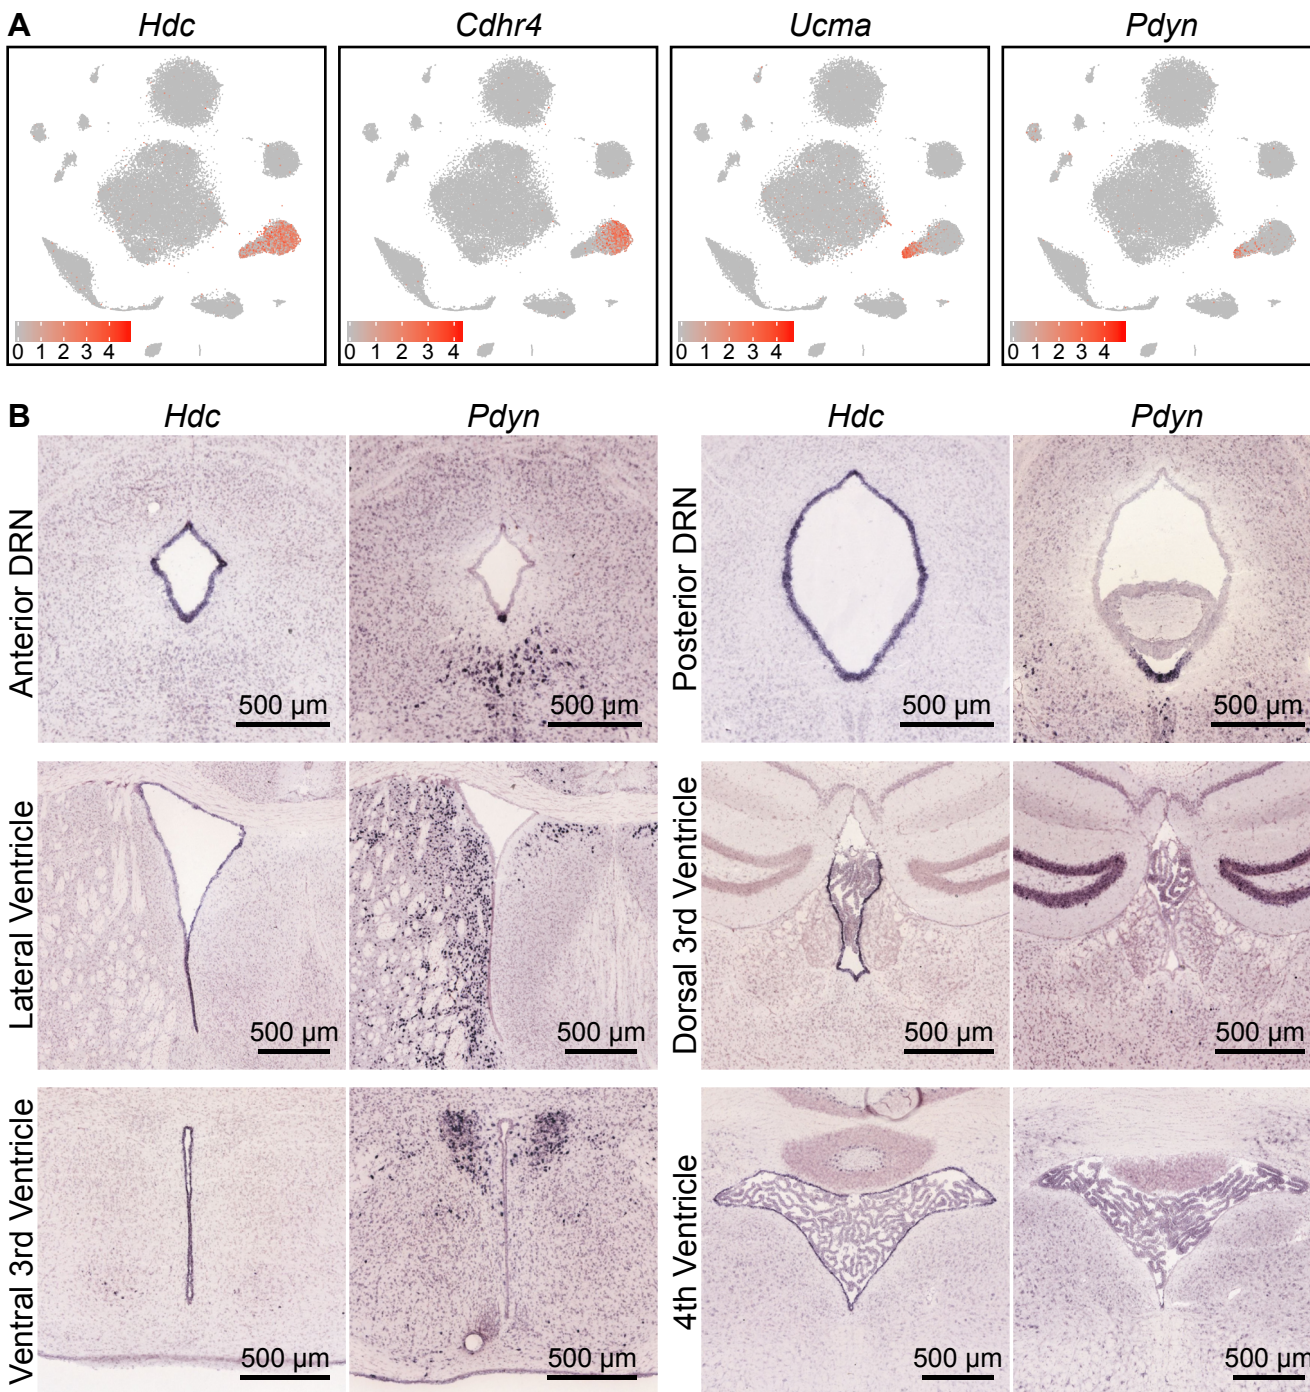

Supplement: supp [file elife-46464-supp-v1.zip › elife_poa_e46464_Figure_1_figure_supplement_2.pdf]

**Figure 8–Figure Supplement 1**

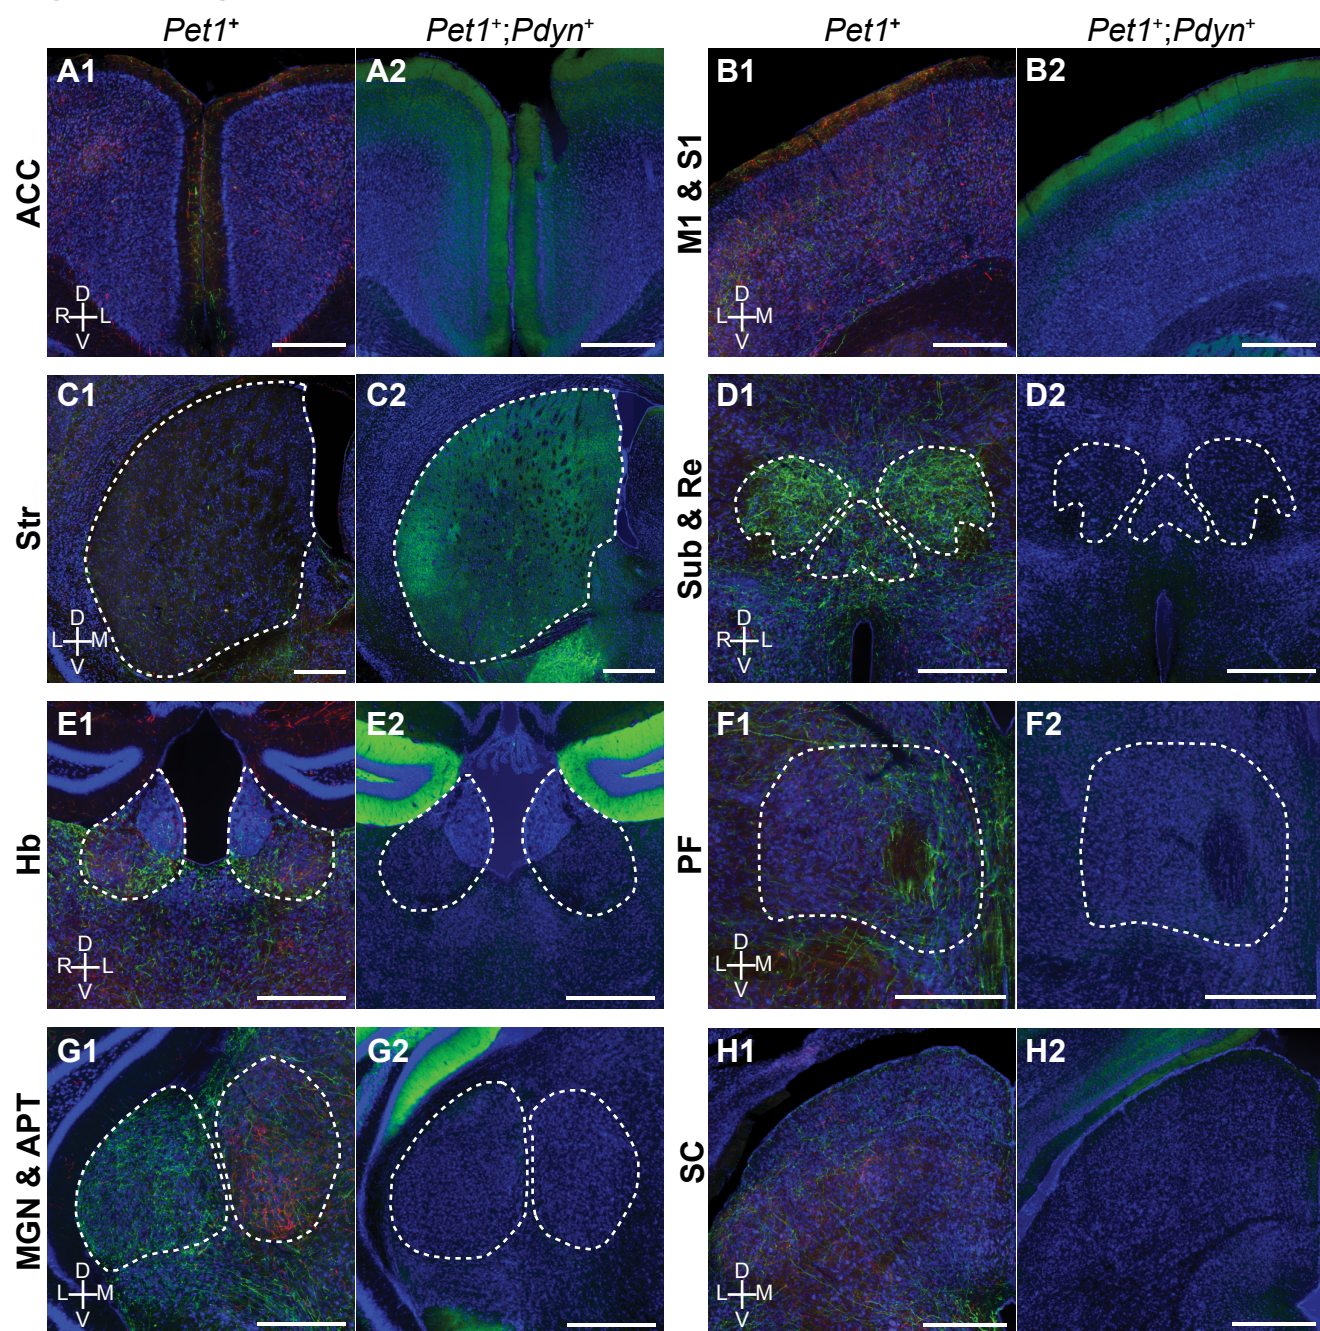

Supplement: supp [file elife-46464-supp-v1.zip › elife_poa_e46464_Figure_8_figure_supplement_1.pdf]
